# Supplementary material
Source: MDPI journal article supplement (https://www.mdpi.com/2073-4352/12/6/778)
Supplement: s1 [file s1]

## Supporting Information

# Pt-Modified Interfacial Engineering for Enhanced Photocatalytic Performance of 3D Ordered Macroporous TiO<sub>2</sub>

Shunhong Dong <sup>1</sup>, Juan Wu <sup>2</sup>, Lanlan Huang <sup>2</sup> and Hong-En Wang <sup>3,4,\*</sup>

<sup>1</sup> State Key Laboratory of Advanced Technology for Materials Synthesis and Processing, Wuhan University of Technology, Wuhan 430070, China; 18789289753@163.com

<sup>2</sup> School of Materials Science and Engineering, Hubei University, Wuhan 430062, China; wj254095@163.com (J.W.); 17756441728@163.com (L.H.)

<sup>3</sup> Yunnan Key Laboratory of Optoelectronic Information Technology, College of Physics and Electronics Information, Yunnan Normal University, Kunming 650500, China;

<sup>4</sup> Key Laboratory of Advanced Technique & Preparation for Renewable Energy Materials, Ministry of Education, Yunnan Normal University, Kunming 650500, China.

\* Correspondence: hongenwang@whut.edu.cn; hongen.wang@ynnu.edu.cn

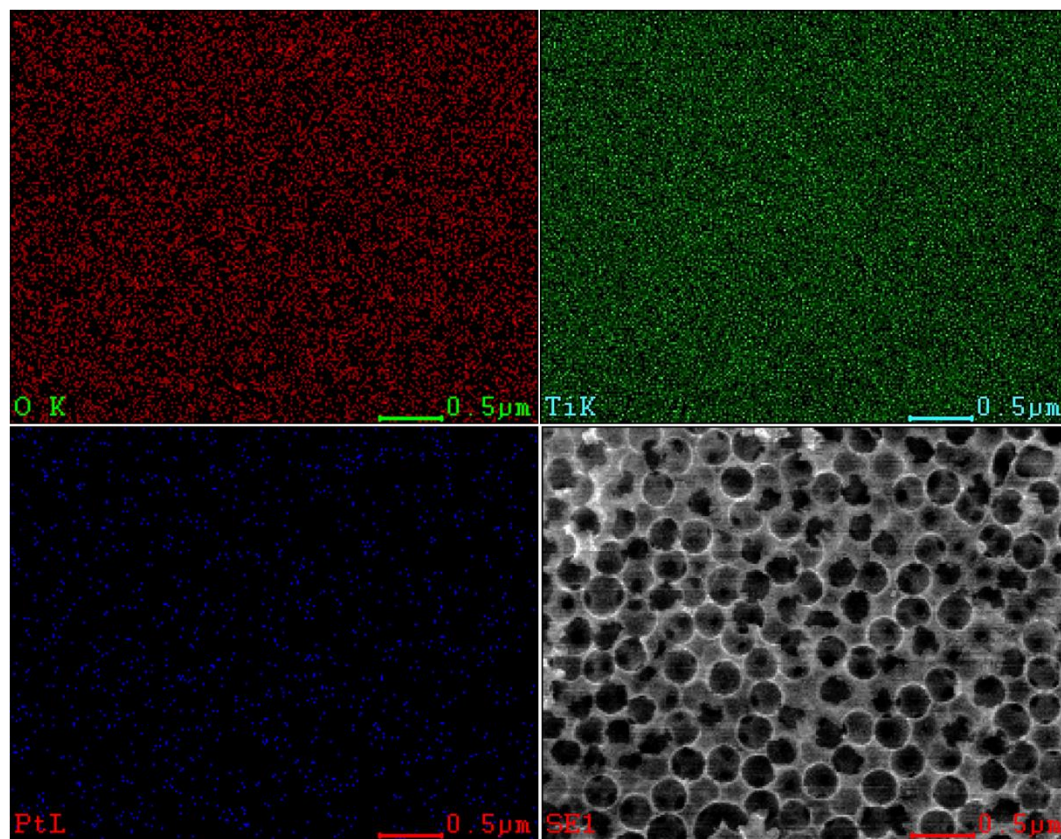

Figure S1. EDS mapping spectra of 3DOM TiO<sub>2</sub>/Pt.

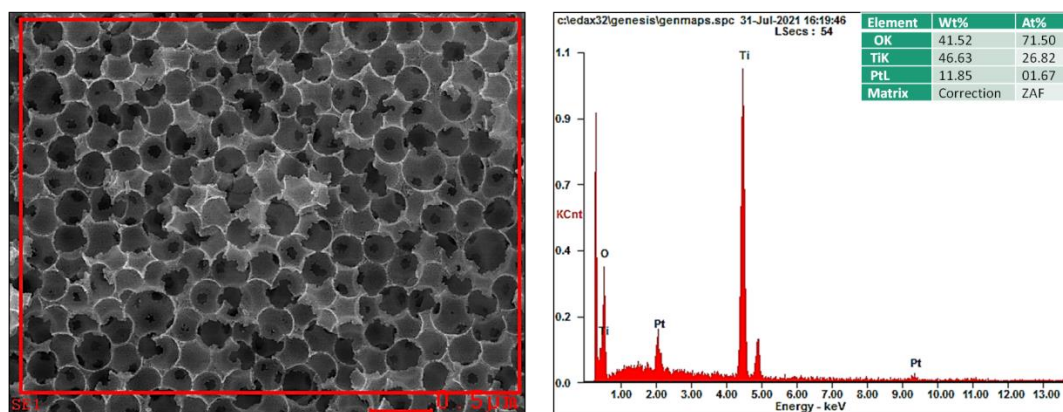

Figure S2. EDS spectroscopy of 3DOM TiO<sub>2</sub>/ Pt.

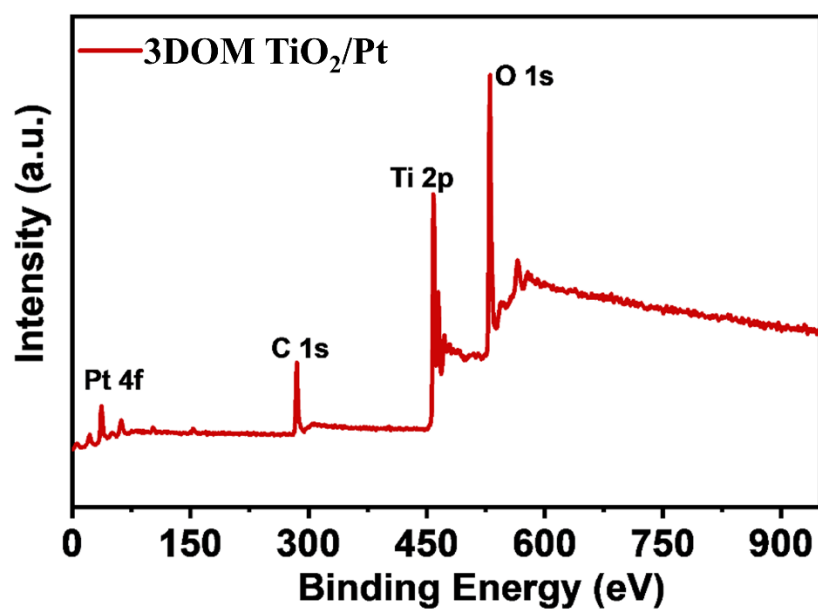

Figure S3. XPS full spectrum of 3DOM TiO<sub>2</sub>/Pt.
